# Supplementary material for: Stereocontrolled syntheses of (−)- and (+)-γ-diisoeugenol along with optically active eight stereoisomers of 7,8′-epoxy-8,7′-neolignan
Source: Royal Society of Chemistry journal article supplement (doi:10.1039/d1ob00008j), 2021-01-01
Supplement: d1ob00008j1.pdf [file d1ob00008j1.pdf]

**Stereocontrolled syntheses of (-)- and (+)- $\gamma$ -diisoeugenol along with  
optically active eight stereoisomers of 7,8'-epoxy-8,7'-neolignan**

Tatsuaki Takubo, Nao Kikuchi, Hisashi Nishiwaki, Satoshi Yamauchi\*

Graduate School of Agriculture, Ehime University, 3-5-7 Tarumi,

Matsuyama, Ehime 790-8566, Japan

Supporting information

Experiment for the syntheses of diol **7-13** and 3-*epi*-**13**.

## Experimental

### General experimental procedures

Melting points (mp) data are uncorrected. Optical rotations were measured on a JASCO P-2100 instrument. NMR data were obtained using a JNM-EX400 spectrometer. EI and FABMS data were measured with a JMS-MS700V spectrometer. The silica gel used was Silica Gel 60N (spherical, neutral, Kanto Chemical, 40-50  $\mu\text{m}$ ). The numbering of compounds follows IUPAC rule.

**(4*S*)-4-Benzyl-3-[(2*R*,3*S*)-3-(4-benzyloxy-3-methoxyphenyl)-3-hydroxy-2-methylpropanoyl]-2-oxazolidinone 7.** A reaction mixture of (*S*)-4-benzyl-3-propanoyl-2-oxazolidinone (18.0 g, 77.2 mmol),  $\text{MgCl}_2$  (0.74 g, 7.77 mmol), 4-benzyloxy-3-methoxybenzaldehyde (22.4 g, 92.5 mmol),  $\text{Et}_3\text{N}$  (21.5 mL, 0.15 mol), and  $\text{TMSCl}$  (14.7 mL, 0.12 mol) in  $\text{EtOAc}$  (50 mL) was stirred at room temperature for 16 h before filtration through silica gel with ether. After concentration of the filtrate, the residue was dissolved in  $\text{MeOH}$ . To this  $\text{MeOH}$  solution was added  $\text{CF}_3\text{CO}_2\text{H}$  (5 mL), and then the reaction mixture was stirred at room temperature for 5 h. The resulting crystals were filtered and recrystallized from  $\text{EtOH}$  to give oxazolidinone **7** (25.1 g, 52.8 mmol, 68%) as colorless crystals, mp 151-152  $^\circ\text{C}$ ,  $[\alpha]_{\text{D}}^{25} -19$  ( $c$  0.8,  $\text{CHCl}_3$ ).  $^1\text{H}$  NMR (400 MHz,  $\text{CDCl}_3$ )  $\delta$  1.09 (3H, d,  $J = 6.8$  Hz,  $\text{CH}_3$ ), 2.66 (1H, dd,  $J = 13.5, 9.4$  Hz,

CHHPh), 3.10 (1H, d,  $J = 7.5$  Hz, OH), 3.19 (1H, dd,  $J = 13.5, 3.2$  Hz, CHHPh), 3.90 (3H, s, OCH<sub>3</sub>), 4.12 (1H, dd,  $J = 9.0, 2.8$  Hz, 5-HH), 4.16 (1H, dd,  $J = 9.0, 7.6$  Hz, 5-HH), 4.33 (1H, m, O=C-CH-CH<sub>3</sub>), 4.67 (1H, m, 4-H), 4.74 (1H, dd,  $J = 7.6, 7.5$  Hz, ArCHOH), 5.13 (2H, s, OCH<sub>2</sub>Ph), 6.84 (1H, d,  $J = 8.2$  Hz), 6.87 (1H, dd,  $J = 8.2, 1.5$  Hz), 7.01 (1H, d,  $J = 1.5$  Hz), 7.15 (2H, d,  $J = 6.8$  Hz), 7.23-7.35 (6H, m), 7.41 (2H, d,  $J = 7.3$  Hz). <sup>13</sup>C NMR (100 MHz, CDCl<sub>3</sub>)  $\delta$  14.8 (CH<sub>3</sub>), 37.5 (O=C-C-Me), 44.1 (CH<sub>2</sub>Ph), 55.4 (4-C), 55.9 (OCH<sub>3</sub>), 65.9 (5-C), 70.9 (OCH<sub>2</sub>Ph), 77.2 (ArCOH), 109.9, 113.5, 118.8, 127.1, 127.2, 127.7, 128.4, 128.8, 129.4, 135.1, 135.2, 137.0, 147.8, 149.7, 153.5 (2-C), 176.5 (N-(C=O)-CCH<sub>3</sub>). FABMS 476 (M+H)<sup>+</sup>. *Anal.* Found: C 70.75%, H 6.44%, N 2.84%; Calcd for C<sub>28</sub>H<sub>29</sub>O<sub>6</sub>N: C 70.72%, H 6.15%, N 2.95%.

*ent-7*.  $[\alpha]_D^{25} +19$  ( $c$  0.7, CHCl<sub>3</sub>), colorless crystals, mp 151-152 °C (MeOH).

**(4S)-4-Benzyl-3-[(2R,3S)-3-(4-benzyloxy-3-methoxyphenyl)-2-methyl-3-(triisopropylsilyloxy)propanoyl]-2-oxazolidinone 8.** To an ice-cooled solution of benzyl alcohol **7** (13.2 g, 27.8 mmol) and 2,6-lutidine (7.80 mL, 67.3 mmol) in CH<sub>2</sub>Cl<sub>2</sub> (20 mL) was added TIPSOTf (8.97 mL, 33.4 mmol). After the reaction solution was stirred at room temperature for 1 h, sat. aq. NaHCO<sub>3</sub> was added. The organic solution was separated, washed with sat. aq. CuSO<sub>4</sub> and sat. aq. NaHCO<sub>3</sub>, dried (Na<sub>2</sub>SO<sub>4</sub>), and concentrated. The residue was recrystallized from *iso*-Pr<sub>2</sub>O

to give silyl ether **8** (16.3 g, 25.8 mmol, 93%) as colorless crystals, mp 93-94 °C;  $[\alpha]_D^{25} -54$  (*c* 0.8, CHCl<sub>3</sub>). <sup>1</sup>H NMR (400 MHz, CDCl<sub>3</sub>)  $\delta$  0.38-0.99 (21H, m, TIPS), 0.86 (3H, d, *J* = 7.0 Hz, CH<sub>3</sub>), 2.64 (1H, dd, *J* = 13.2, 10.8 Hz, 4-CHHPh), 3.52 (1H, dd, *J* = 13.2, 3.2 Hz, 4-CHHPh), 3.90 (3H, s, OCH<sub>3</sub>), 4.13 (2H, d, *J* = 5.2 Hz, 5-CH<sub>2</sub>), 4.32 (1H, m, O=C-CH-CH<sub>3</sub>), 4.65 (1H, m, 4-H), 5.04 (1H, d, *J* = 8.8 Hz, ArCHOTIPS), 5.13 (2H, s, OCH<sub>2</sub>Ph), 6.80 (2H, d, *J* = 0.8 Hz), 7.06 (1H, s), 7.24-7.29 (4H, m), 7.32-7.36 (4H, m), 7.42-7.43 (2H, m). <sup>13</sup>C NMR (100 MHz, CDCl<sub>3</sub>)  $\delta$  12.6 (TIPS), 14.6 (CH<sub>3</sub>), 18.0 (TIPS), 18.1 (TIPS), 38.3 (O=C-C-Me), 46.2 (4-C), 55.8 (OCH<sub>3</sub>), 56.0 (4-C), 65.9 (5-C), 71.1 (OCH<sub>2</sub>Ph), 77.6 (ArCOH), 111.0, 113.4, 120.2, 127.3, 127.4, 127.8, 128.5, 129.0, 129.3, 135.7, 135.9, 137.1, 147.9, 149.7, 153.3 (2-C), 175.8 (N-(C=O)-CCH<sub>3</sub>); FABMS 632 (M+H)<sup>+</sup>. *Anal.* Found: C 70.31%, H 8.07%, N 2.06%; Calcd for C<sub>37</sub>H<sub>49</sub>O<sub>6</sub>NSi: C70.33%, H 7.82%, N2.22%.

*ent-8*.  $[\alpha]_D^{25} +53$  (*c* 0.8, CHCl<sub>3</sub>), colorless crystals, mp 96-98 °C (*iso*-Pr<sub>2</sub>O)

**(2*S*,3*S*)-3-(4-Benzyloxy-3-methoxyphenyl)-2-methyl-3-(triisopropylsilyloxy)-1-propanol 9**. To a solution of oxazolidinone **8** (16.3 g, 25.7 mmol) and MeOH (8 mL) in THF (50 mL) was added a suspension of LiBH<sub>4</sub> (0.16 mol) in THF (100 mL). After stirring at room temperature for 1 h, sat. aq. NH<sub>4</sub>Cl was added. The organic solution was separated and dried (Na<sub>2</sub>SO<sub>4</sub>). Concentration followed by silica gel

column chromatography (5% EtOAc/toluene) gave alcohol **9** (11.2 g, 24.4 mmol, 95%) as a colorless oil,  $[\alpha]_D^{25} -86$  ( $c$  0.8,  $\text{CHCl}_3$ ).  $^1\text{H}$  NMR (400 MHz,  $\text{CDCl}_3$ )  $\delta$  0.77 (3H, d,  $J = 7.0$  Hz,  $\text{CH}_3$ ), 0.95-1.01 (21H, m, TIPS), 2.00 (1H, m, OH), 2.70 (1H, m, 2-H), 3.62 (2H, br s, 1-H), 3.87 (3H, s,  $\text{OCH}_3$ ), 4.70 (1H, d,  $J = 6.8$  Hz, 3-H), 5.13 (2H, s,  $\text{OCH}_2\text{Ph}$ ), 6.73 (1H, dd,  $J = 8.2, 1.8$  Hz), 6.80 (1H, d,  $J = 8.2$  Hz), 6.94 (1H, d,  $J = 1.8$  Hz), 7.30 (1H, m), 7.35 (2H, dd,  $J = 8.0, 7.3$  Hz), 7.43 (2H, br d,  $J = 7.3$  Hz).  $^{13}\text{C}$  NMR (100 MHz,  $\text{CDCl}_3$ )  $\delta$  12.5 (TIPS), 13.4 ( $\text{CH}_3$ ), 17.9 (TIPS), 18.1 (TIPS), 43.7 (2-C), 55.9 ( $\text{OCH}_3$ ), 66.4 (1-C), 71.1 ( $\text{OCH}_2\text{Ph}$ ), 79.8 (3-C), 110.6, 113.4, 119.4, 127.4, 127.8, 128.5, 136.7, 137.2, 147.4, 149.4. FABMS 459 ( $\text{M}^+ + \text{H}$ ). *Anal.* Found: C 70.83%, H 9.33%; Calcd for  $\text{C}_{27}\text{H}_{42}\text{O}_4\text{Si}$ : C 70.70%, H 9.23%.

*ent-9*. colorless oil,  $[\alpha]_D^{25} +84$  ( $c$  0.9,  $\text{CHCl}_3$ )

**(2*R*,3*S*)-3-(4-Benzoyloxy-3-methoxyphenyl)-2-methyl-3-**

**(triisopropylsilyloxy)propanal 10.** A reaction mixture of alcohol **9** (6.43 g, 14.0 mmol), PCC (3.60 g, 16.7 mmol), and MS 4A (1 g) in  $\text{CH}_2\text{Cl}_2$  (80 mL) was stirred at 0 °C for 16 h before addition of ether. After filtration, the filtrate was concentrated. The residue was applied to silica gel column chromatography (10% EtOAc/hexane) to give aldehyde **10** (4.45 g, 9.74 mmol, 70%) as a colorless oil,  $[\alpha]_D^{25} -66$  ( $c$  2.4,  $\text{CHCl}_3$ ).  $^1\text{H}$  NMR (400 MHz,  $\text{CDCl}_3$ )  $\delta$  0.88 (3H, d,  $J = 6.9$  Hz,  $\text{CH}_3$ ), 0.93-1.04 (21H, m, TIPS), 2.73 (1H, m, 2-CH), 3.88 (3H, s,  $\text{OCH}_3$ ), 4.92 (1H, d,  $J = 7.5$  Hz, 3-

CH), 5.13 (2H, s, OCH<sub>2</sub>Ph), 6.72 (1H, dd,  $J = 8.2, 1.9$  Hz), 6.81 (1H, d,  $J = 8.2$  Hz), 6.92 (1H, d,  $J = 1.9$  Hz), 7.29 (1H, m), 7.36 (2H, dd,  $J = 7.5, 7.1$  Hz), 7.43 (2H, d,  $J = 7.1$  Hz), 9.82 (1H, d,  $J = 2.7$  Hz, CHO). <sup>13</sup>C NMR (100 MHz, CDCl<sub>3</sub>)  $\delta$  10.5 (CH<sub>3</sub>), 12.4 (TIPS), 17.9 (TIPS), 18.0 (TIPS), 55.1 (2-C), 55.9 (OCH<sub>3</sub>), 71.0 (OCH<sub>2</sub>Ph), 76.3 (3-C), 110.1, 113.3, 119.2, 127.3, 127.8, 128.5, 135.4, 137.0, 147.7, 149.5, 204.5 (CHO); FABMS 457 (M+H)<sup>+</sup>. *Anal.* Found: C 71.22%, H 8.95%; Calcd for C<sub>27</sub>H<sub>40</sub>O<sub>4</sub>Si: C 71.01%, H 8.83%.

*ent*-**10**. colorless oil,  $[\alpha]_D^{25} +67$  ( $c$  1.1, CHCl<sub>3</sub>)

**(3*R*,4*S*,5*S*)-5-(4-Benzoyloxy-3-methoxyphenyl)-4-methyl-5-triisopropylsilyloxy-1-penten-3-ol 11 and (3*S*,4*S*,5*S*)-5-(4-benzyloxy-3-methoxyphenyl)-4-methyl-5-triisopropylsilyloxy-1-penten-3-ol 3-*epi*-11.**

To an ice-cooled solution of vinylmagnesium bromide (17.5 mL, 1 M in THF, 17.5 mmol) in THF (20 mL) was added a solution of aldehyde **10** (4.00 g, 8.76 mmol) in THF (10 mL). The reaction solution was stirred at room temperature for 1 h before additions of sat. aq. NH<sub>4</sub>Cl and EtOAc. The organic solution was separated, dried (Na<sub>2</sub>SO<sub>4</sub>), and concentrated.

The residue was applied to silica gel column chromatography (EtOAc/hexane = 1/8) to give allyl alcohol 3-*epi*-**11** (0.61 g, 1.26 mmol, 14%) as a colorless oil and **11** (2.06 g, 4.25 mmol, 49%) as a colorless oil. 3-*epi*-**11**:  $[\alpha]_D^{25} -31$  ( $c$  1.4, CHCl<sub>3</sub>). <sup>1</sup>H NMR (400 MHz, CDCl<sub>3</sub>)  $\delta$  0.67 (3H, d,  $J = 7.1$  Hz, CH<sub>3</sub>), 0.87-1.10 (21H, m, TIPS), 1.70 (1H, br. s, OH),

2.05 (1H, m, 4-H), 3.89 (3H, s, OCH<sub>3</sub>), 4.80 (1H, m, 3-H), 4.92 (1H, d,  $J = 3.6$  Hz, 5-H), 5.07-5.16 (2H, overlapped, 1-CH<sub>2</sub>), 5.14 (2H, s, OCH<sub>2</sub>Ph), 5.77 (1H, ddd,  $J = 17.1, 10.1, 7.1$  Hz, 2-CH), 6.76 (1H, dd,  $J = 8.2, 1.8$  Hz), 6.84 (1H, d,  $J = 8.2$  Hz), 7.04 (1H, d,  $J = 1.8$  Hz), 7.30 (1H, m), 7.36 (2H, dd,  $J = 7.0, 7.0$  Hz), 7.44 (2H, d,  $J = 7.0$  Hz). <sup>13</sup>C NMR (100 MHz, CDCl<sub>3</sub>)  $\delta$  12.1 (TIPS), 13.8 (CH<sub>3</sub>), 17.9 (TIPS), 44.5 (4-C), 56.0 (OCH<sub>3</sub>), 71.0 (OCH<sub>2</sub>Ph), 75.2 (3-C), 80.3 (5-C), 111.1, 113.1, 116.1 (1-C), 119.8, 127.4, 127.8, 128.4, 133.5 (2-C), 137.1, 139.8, 147.4, 149.1. FABMS: 485 (M+H)<sup>+</sup>. HRMS (FAB): calculated C<sub>29</sub>H<sub>45</sub>O<sub>4</sub>Si: 485.3086, found: 485.3083. **11**:  $[\alpha]_D^{25} -39$  ( $c$  1.5, CHCl<sub>3</sub>). <sup>1</sup>H NMR (400 MHz, CDCl<sub>3</sub>)  $\delta$  0.89 (3H, d,  $J = 7.2$  Hz, CH<sub>3</sub>), 0.95-1.02 (21H, m, TIPS), 1.79 (1H, m, 4-H), 3.10 (1H, d,  $J = 3.1$  Hz, OH), 3.88 (3H, s, OCH<sub>3</sub>), 4.52 (1H, m, 3-H), 4.85 (1H, d,  $J = 5.4$  Hz, 5-H), 5.12 (1H, ddd,  $J = 10.4, 1.8, 1.8$  Hz, 1-CHH), 5.14 (2H, s, OCH<sub>2</sub>Ph), 5.24 (1H, ddd,  $J = 17.3, 1.8, 1.8$  Hz, 1-CHH), 5.79 (1H, ddd,  $J = 17.3, 10.4, 5.4$  Hz, 2-H), 6.75 (1H, dd,  $J = 8.2, 1.8$  Hz), 6.82 (1H, d,  $J = 8.2$  Hz), 6.94 (1H, d,  $J = 1.8$  Hz), 7.29 (1H, m), 7.35 (2H, dd,  $J = 7.7, 7.0$  Hz), 7.43 (2H, d,  $J = 7.7$  Hz). <sup>13</sup>C NMR (100 MHz, CDCl<sub>3</sub>)  $\delta$  10.9 (CH<sub>3</sub>), 12.6 (TIPS), 18.0 (TIPS), 45.7 (4-C), 55.9 (OCH<sub>3</sub>), 71.1 (OCH<sub>2</sub>Ph), 71.4 (3-C), 79.4 (5-C), 110.1, 113.5, 114.3 (1-C), 118.9, 127.3, 127.8, 128.4, 136.9 (2-C), 137.1, 139.8, 147.3, 149.3. FABMS: 485 (M+H)<sup>+</sup>. *Anal.* Found: C 71.77%, H 9.08%; Calcd for C<sub>29</sub>H<sub>44</sub>O<sub>4</sub>Si: C 71.85%, H 9.15%.

*ent*-3-*epi*-**11**. colorless oil,  $[\alpha]_D^{25} +36$  (*c* 1.3, CHCl<sub>3</sub>)

*ent*-**11**. colorless oil,  $[\alpha]_D^{25} +40$  (*c* 1.0, CHCl<sub>3</sub>)

**(4*R*,5*S*)-5-(4-Benzoyloxy-3-methoxyphenyl)-4-methyl-5-**

**(triisopropylsilyloxy)-1-penten-3-one 12**. A reaction mixture of **11** (1.00 g, 2.06 mmol), PDC (0.94 g, 2.50 mmol), and MS 4A (0.3 g) in CH<sub>2</sub>Cl<sub>2</sub> (20 mL) was stirred at room temperature for 16 h before filtration.

Concentration of the filtrate, followed by silica gel column chromatography (EtOAc/hexane = 1/9) gave ketone **12** (0.65 g, 1.35 mmol, 66%) as a colorless oil;  $[\alpha]_D^{25} -88$  (*c* 1.5, CHCl<sub>3</sub>). <sup>1</sup>H NMR (400 MHz, CDCl<sub>3</sub>)  $\delta$  0.75 (3H, d, *J* = 7.0 Hz, CH<sub>3</sub>), 0.88-1.10 (21H, m, TIPS), 3.21 (1H, m, 4-H), 3.89 (3H, s, OCH<sub>3</sub>), 4.90 (1H, d, *J* = 8.6 Hz, 5-H), 5.14 (2H, s, OCH<sub>2</sub>Ph), 5.81 (1H, d, *J* = 10.6 Hz, 1-CHH), 6.30 (1H, d, *J* = 17.4 Hz, 1-CHH), 6.49 (1H, dd, *J* = 17.4, 10.6 Hz, 2-H), 6.75 (1H, d, *J* = 8.2 Hz), 6.81 (1H, d, *J* = 8.1 Hz), 6.92 (1H, s), 7.29 (1H, dd, *J* = 7.2, 7.2 Hz), 7.35 (2H, dd, *J* = 7.5, 7.2 Hz), 7.43 (2H, d, *J* = 7.3 Hz). <sup>13</sup>C NMR (100 MHz, CDCl<sub>3</sub>)  $\delta$  12.4 (TIPS), 13.9 (CH<sub>3</sub>), 17.9 (TIPS), 51.7 (4-C), 55.9 (OCH<sub>3</sub>), 71.0 (OCH<sub>2</sub>Ph), 77.7 (5-C), 110.4, 113.3, 119.6, 127.3, 127.8, 128.0, 128.4, 136.1, 136.98, 137.04, 147.6, 149.4, 203.5 (C=O); FABMS 483 (M+H)<sup>+</sup>. HRMS (FAB): calculated C<sub>29</sub>H<sub>43</sub>O<sub>4</sub>Si: 483.2930, found: 483.2922

*ent*-**12**. colorless oil,  $[\alpha]_D^{25} +87$  (*c* 0.9, CHCl<sub>3</sub>)

**Reduction of ketone 12**. Method A: To a solution of ketone **12** (0.30 g, 0.62 mmol) in MeOH (5 mL) and THF (5 mL) was added



CeCl<sub>3</sub>·7H<sub>2</sub>O (0.31 g, 0.83 mmol) and NaBH<sub>4</sub> (27 mg, 0.71 mmol) at –60 °C, and then the reaction mixture was warmed to 0 °C. After stirring at 0 °C for 30 min, sat. aq. NH<sub>4</sub>Cl and CHCl<sub>3</sub> were added. The organic solution was separated and dried (Na<sub>2</sub>SO<sub>4</sub>). Concentration followed by silica gel column chromatography (EtOAc/hexane = 1/8) gave alcohol 3-*epi*-**11** (0.11 g, 0.23 mmol, 37%) and **11** (0.14 g, 0.29 mmol, 47%). Method B: To a solution of **12** (0.35 g, 0.73 mmol) in toluene (10 mL) was added DIBAL-H (1.50 mL, 1.0 M in toluene, 1.50 mmol) at –75 °C. After the reaction solution was stirred at –75 °C for 2 h, 1 M aq. HCl and EtOAc were added. The organic solution was separated, washed with sat. aq. NaHCO<sub>3</sub> and brine, and dried (Na<sub>2</sub>SO<sub>4</sub>). Concentration followed by silica gel column chromatography (EtOAc/hexane = 1/8) gave alcohol 3-*epi*-**11** (0.19 g, 0.39 mmol, 54%) and **11** (29 mg, 0.060 mmol, 8%).

**(3*S*,4*S*,5*S*)-5-(4-Benzoyloxy-3-methoxyphenyl)-4-methyl-1-pentene-3,5-diol 3-*epi*-13.** To a solution of silyl ether 3-*epi*-**11** (1.50 g, 3.09 mmol) in THF (10 mL) was added a solution of *n*-Bu<sub>4</sub>NF (3.50 mL, 1 M in THF, 3.50 mmol). After the reaction solution was stirred at room temperature for 1 h, EtOAc and sat. aq. CuSO<sub>4</sub> were added. The organic solution was separated, washed with sat. aq. NaHCO<sub>3</sub>, and dried (Na<sub>2</sub>SO<sub>4</sub>). Concentration followed by silica gel column chromatography (EtOAc/hexane = 2/3) gave diol 3-*epi*-**13** (0.92 g, 2.80 mmol, 91%) as colorless crystals, mp 65-66 °C, [α]<sub>D</sub><sup>25</sup> +3 (c1.0, CHCl<sub>3</sub>). <sup>1</sup>H NMR (400

MHz, CDCl<sub>3</sub>)  $\delta$  0.49 (3H, d,  $J$  = 6.9 Hz, CH<sub>3</sub>), 1.87 (1H, m, 4-H), 3.86-4.00 (2H, br, OH), 3.87 (3H, s, OCH<sub>3</sub>), 4.09 (1H, dd,  $J$  = 7.9, 7.9 Hz, 3-H), 4.42 (1H, d,  $J$  = 9.2 Hz, 5-H), 5.12 (2H, s, OCH<sub>2</sub>Ph), 5.16 (1H, dd,  $J$  = 10.3, 1.5 Hz, 1-CHH), 5.24 (1H, d,  $J$  = 17.0 Hz, 1-CHH), 5.85 (1H, ddd,  $J$  = 17.0, 10.3, 7.9 Hz, 2-H), 6.73 (1H, dd,  $J$  = 8.1, 1.8 Hz), 6.80 (1H, d,  $J$  = 8.1 Hz), 6.90 (1H, d,  $J$  = 1.8 Hz), 7.28 (1H, m), 7.35 (2H, dd,  $J$  = 7.2, 7.2 Hz), 7.42 (2H, d,  $J$  = 7.2 Hz). <sup>13</sup>C NMR (100 MHz, CDCl<sub>3</sub>)  $\delta$  13.6 (CH<sub>3</sub>), 44.4 (4-C), 55.9 (OCH<sub>3</sub>), 70.9 (OCH<sub>2</sub>Ph), 79.0 (3-C), 80.2 (5-C), 110.1, 113.3, 116.7 (1-C), 119.5, 127.2, 127.7, 128.4, 136.3 (2-C), 137.0, 139.2, 147.6, 149.6. FABMS 329 (M+H)<sup>+</sup>. HRMS (FAB): calculated C<sub>20</sub>H<sub>25</sub>O<sub>4</sub>: 329.1753, found: 329.1749.

*ent*-3-*epi*-**13**. colorless crystals, mp 75-77 °C;  $[\alpha]_D^{25}$  -3 ( $c$  0.5, CHCl<sub>3</sub>).

**(3*R*,4*S*,5*S*)-5-(4-Benzoyloxy-3-methoxyphenyl)-4-methyl-1-pentene-3,5-diol 13**. 95% yield from silyl ether **11**. colorless oil,  $[\alpha]_D^{25}$  +1.8 ( $c$  1.4, CHCl<sub>3</sub>). <sup>1</sup>H NMR (400 MHz, CDCl<sub>3</sub>)  $\delta$  0.69 (3H, d,  $J$  = 7.2 Hz, CH<sub>3</sub>), 2.02 (1H, m, 4-H), 3.50 (2H, br. s, OH), 3.86 (3H, s, OCH<sub>3</sub>), 4.31 (1H, m, 3-H), 4.50 (1H, d,  $J$  = 8.3 Hz, 5-H), 5.12 (2H, s, OCH<sub>2</sub>Ph), 5.20 (1H, ddd,  $J$  = 10.6, 1.5, 1.5 Hz, 1-CHH), 5.27 (1H, ddd,  $J$  = 17.3, 1.5, 1.5 Hz, 1-CHH), 5.93 (1H, ddd,  $J$  = 17.3, 10.6, 5.5 Hz, 2-H), 6.73 (1H, dd,  $J$  = 8.2, 1.9 Hz), 6.81 (1H, d,  $J$  = 8.2 Hz), 6.88 (1H, d,  $J$  = 1.9 Hz), 7.28 (1H, m), 7.35 (2H, dd  $J$  = 7.6, 7.6 Hz), 7.42 (2H, d,  $J$  = 7.6 Hz). <sup>13</sup>C

NMR (100 MHz, CDCl<sub>3</sub>)  $\delta$  12.4 (CH<sub>3</sub>), 44.0 (4-C), 55.9 (OCH<sub>3</sub>), 71.0 (OCH<sub>2</sub>Ph), 74.9 (3-C), 77.6 (5-C), 109.9, 113.5, 115.5 (1-C), 118.8, 127.2, 127.7, 128.4, 136.7 (2-C), 137.0, 137.9, 147.5, 149.5. FABMS 329 (M+H)<sup>+</sup>. *Anal.* Found: C 73.36%, H 7.43%; Calcd for C<sub>20</sub>H<sub>24</sub>O<sub>4</sub>: C 73.15%, H 7.37%.

*ent*-**13**. colorless oil,  $[\alpha]_{\text{D}}^{25} -2.3$  (*c*1.2, CHCl<sub>3</sub>)
